# Supplementary material for: The neural basis of understanding the expression of the emotions in man and animals
Source: PubMed Central journal article supplement — Soc Cogn Affect Neurosci. 2016 Nov 1;12(1):95–105. doi: 10.1093/scan/nsw161 (PMC5390760; doi:10.1093/scan/nsw161), 2016-11-01

**Supplementary Materials for**

The Neural Basis of Understanding the Expression of the Emotions in Man and Animals

Robert P. Spunt, Emily Ellsworth, Ralph Adolphs  
California Institute of Technology

Corresponding Author:  
Robert P. Spunt  
California Institute of Technology  
1200 E. California Blvd.  
Pasadena, CA 91125  
Email: [spunt@caltech.edu](mailto:spunt@caltech.edu)

**Table S1**

Details for the set of left hemisphere regions of interest (ROIs) used to test our primary hypotheses.

| <i>ROI Name</i>                          | <i>Extent</i> | <u>Peak MNI Coordinates</u> |          |          |
|------------------------------------------|---------------|-----------------------------|----------|----------|
|                                          |               | <i>x</i>                    | <i>y</i> | <i>z</i> |
| Lateral Orbitofrontal Cortex (LOFC)      | 516           | -48                         | 27       | -6       |
| Temporoparietal Junction (TPJ)           | 521           | -48                         | -66      | 30       |
| Anterior Superior Temporal Sulcus (aSTS) | 650           | -57                         | -9       | -18      |
| Dorsomedial Prefrontal Cortex (dmPFC)    | 1000          | -6                          | 57       | 36       |

**Table S2**

Repeated measures analysis of variance for behavioral outcomes of interest. See **Table 2** in the main text for descriptive data summarizing the outcomes.

| Outcome                                        | Effect                 | SS     | df | MS     | F      | p     | <i>Partial</i> $\eta^2$ | 95% CI |      |
|------------------------------------------------|------------------------|--------|----|--------|--------|-------|-------------------------|--------|------|
| <i>Acceptance Rate</i>                         |                        |        |    |        |        |       |                         |        |      |
|                                                | Within-Subjects        |        |    |        |        |       |                         |        |      |
|                                                | - Question             | 0.008  | 1  | 0.008  | 0.039  | 0.847 | 0.003                   | 0.00   | 0.36 |
|                                                | - Target               | 0.453  | 2  | 0.226  | 2.426  | 0.106 | 0.139                   | 0.01   | 0.45 |
|                                                | - Question*Target      | 0.222  | 2  | 0.111  | 1.354  | 0.274 | 0.083                   | 0.01   | 0.35 |
|                                                | Within-Cells           | 12.137 | 90 | 0.135  |        |       |                         |        |      |
|                                                | - Subjects             | 3.935  | 15 | 0.262  |        |       |                         |        |      |
|                                                | - Question*Subj        | 2.942  | 15 | 0.196  |        |       |                         |        |      |
|                                                | - Target*Subj          | 2.800  | 30 | 0.093  |        |       |                         |        |      |
|                                                | - Question*Target*Subj | 2.460  | 30 | 0.082  |        |       |                         |        |      |
|                                                | Total                  | 12.819 | 95 | 0.135  |        |       |                         |        |      |
| <i>Acceptance Response Time</i>                |                        |        |    |        |        |       |                         |        |      |
|                                                | Within-Subjects        |        |    |        |        |       |                         |        |      |
|                                                | - Question             | 0.300  | 1  | 0.300  | 50.714 | 0.000 | 0.772                   | 0.68   | 0.88 |
|                                                | - Target               | 0.053  | 2  | 0.027  | 11.031 | 0.000 | 0.424                   | 0.24   | 0.71 |
|                                                | - Question*Target      | 0.003  | 2  | 0.001  | 0.776  | 0.469 | 0.049                   | 0.01   | 0.29 |
|                                                | Within-Cells           | 1.074  | 90 | 0.012  |        |       |                         |        |      |
|                                                | - Subjects             | 0.858  | 15 | 0.057  |        |       |                         |        |      |
|                                                | - Question*Subj        | 0.089  | 15 | 0.006  |        |       |                         |        |      |
|                                                | - Target*Subj          | 0.072  | 30 | 0.002  |        |       |                         |        |      |
|                                                | - Question*Target*Subj | 0.055  | 30 | 0.002  |        |       |                         |        |      |
|                                                | Total                  | 1.430  | 95 | 0.015  |        |       |                         |        |      |
| <i>Post-Task Emotion Understanding Ratings</i> |                        |        |    |        |        |       |                         |        |      |
|                                                | Within-Subjects        | 14.626 | 2  | 7.313  | 22.824 | 0.000 | 0.603                   | 0.41   | 0.79 |
|                                                | - Human > Primate      | 11.915 | 1  | 11.915 | 37.187 | 0.000 | 0.553                   | 0.36   | 0.74 |
|                                                | - Human > Dog          | 9.933  | 1  | 9.933  | 31.003 | 0.000 | 0.508                   | 0.28   | 0.75 |
|                                                | - Primate > Dog        | 0.090  | 1  | 0.090  | 0.281  | 0.600 | 0.009                   | 0.00   | 0.15 |
|                                                | Within-Groups          | 44.854 | 45 | 0.997  |        |       |                         |        |      |
|                                                | - Subj                 | 35.242 | 15 | 2.349  |        |       |                         |        |      |
|                                                | - Group X Subj         | 9.612  | 30 | 0.320  |        |       |                         |        |      |
|                                                | Total                  | 59.479 | 47 | 1.266  |        |       |                         |        |      |
| <i>Post-Task Valence Ratings</i>               |                        |        |    |        |        |       |                         |        |      |

|                   |        |    |       |       |       |       |      |      |
|-------------------|--------|----|-------|-------|-------|-------|------|------|
| Within-Subjects   | 0.626  | 2  | 0.313 | 1.434 | 0.254 | 0.087 | 0.01 | 0.35 |
| - Human > Primate | 0.606  | 1  | 0.606 | 2.780 | 0.106 | 0.085 | 0.00 | 0.33 |
| - Human > Dog     | 0.260  | 1  | 0.260 | 1.192 | 0.284 | 0.038 | 0.00 | 0.22 |
| - Primate > Dog   | 0.072  | 1  | 0.072 | 0.331 | 0.569 | 0.011 | 0.00 | 0.22 |
| Within-Groups     | 13.515 | 45 | 0.300 |       |       |       |      |      |
| - Subj            | 6.971  | 15 | 0.465 |       |       |       |      |      |
| - Group X Subj    | 6.544  | 30 | 0.218 |       |       |       |      |      |
| Total             | 14.141 | 47 | 0.301 |       |       |       |      |      |

---

---

**Table S3**

Whole-brain results for contrasts used to test the conjunction hypotheses for both the Explicit and Implicit tasks. Clusters were identified using a cluster-forming threshold of  $p < .001$  (uncorrected) and a cluster-level family-wise error rate of 0.05. Within each cluster, we report a maximum of 3 local maxima separated by at least 20 mm. x, y, and z = Montreal Neurological Institute (MNI) coordinates in the left-right, anterior-posterior, and inferior-superior dimensions, respectively. L = Left; R = Right; LOFC = Lateral Orbitofrontal Cortex; aSTS = Anterior Superior Temporal Sulcus; PFC = Prefrontal Cortex; PCC = Posterior Cingulate Cortex.

| Contrast Name                                                                                                                                                                  | MNI Coordinates                    |        |         |     |     |     |
|--------------------------------------------------------------------------------------------------------------------------------------------------------------------------------|------------------------------------|--------|---------|-----|-----|-----|
|                                                                                                                                                                                | Cluster Label                      | Extent | t-value | x   | y   | z   |
| <i>Human<sub>Emotion&gt;Expression</sub> &amp; Primate<sub>Emotion&gt;Expression</sub> &amp; Dog<sub>Emotion&gt;Expression</sub></i>                                           |                                    |        |         |     |     |     |
|                                                                                                                                                                                | L Dorsomedial PFC                  | 481    | 6.256   | -8  | 56  | 28  |
|                                                                                                                                                                                | L Lateral Orbitofrontal Cortex     | 357    | 5.745   | -46 | 26  | -14 |
| <i>Human<sub>Expression&gt;Emotion</sub> &amp; Primate<sub>Expression&gt;Emotion</sub> &amp; Dog<sub>Expression&gt;Emotion</sub></i>                                           |                                    |        |         |     |     |     |
|                                                                                                                                                                                | L rostral Inferior Parietal Lobule | 214    | 5.896   | -32 | -44 | 40  |
|                                                                                                                                                                                | L SupraMarginal Gyrus              | 236    | 4.732   | -58 | -34 | 46  |
| <i>Human<sub>Emotion&gt;Expression</sub> &gt; Primate<sub>Emotion&gt;Expression</sub> &amp; Human<sub>Emotion&gt;Expression</sub> &gt; Dog<sub>Emotion&gt;Expression</sub></i> |                                    |        |         |     |     |     |
| <i>No suprathreshold clusters</i>                                                                                                                                              |                                    |        |         |     |     |     |
| <i>Primate<sub>Emotion&gt;Expression</sub> &gt; Human<sub>Emotion&gt;Expression</sub> &amp; Dog<sub>Emotion&gt;Expression</sub> &gt; Human<sub>Emotion&gt;Expression</sub></i> |                                    |        |         |     |     |     |
| <i>No suprathreshold clusters</i>                                                                                                                                              |                                    |        |         |     |     |     |
| <i>Human<sub>Emotion+Expression</sub> &gt; Primate<sub>Emotion+Expression</sub> &amp; Human<sub>Emotion+Expression</sub> &gt; Dog<sub>Emotion+Expression</sub></i>             |                                    |        |         |     |     |     |
|                                                                                                                                                                                | L PCC                              | 632    | 6.003   | -4  | -54 | 26  |
|                                                                                                                                                                                | R aSTS                             | 228    | 5.177   | 52  | -8  | -16 |
|                                                                                                                                                                                | R Ventromedial PFC                 | 473    | 4.906   | 8   | 56  | -12 |
|                                                                                                                                                                                | L aSTS                             | 149    | 4.070   | -52 | -12 | -16 |
| <i>Primate<sub>Emotion+Expression</sub> &gt; Human<sub>Emotion+Expression</sub> &amp; Dog<sub>Emotion+Expression</sub> &gt; Human<sub>Emotion+Expression</sub></i>             |                                    |        |         |     |     |     |
|                                                                                                                                                                                | R Middle Occipital Gyrus           | 1008   | 6.166   | 34  | -88 | 10  |
|                                                                                                                                                                                | L Middle Occipital Gyrus           | 1072   | 6.082   | -28 | -92 | 12  |
|                                                                                                                                                                                | L Fusiform Gyrus                   | 145    | 5.106   | -40 | -64 | -8  |

|                           |     |       |    |     |    |
|---------------------------|-----|-------|----|-----|----|
| R Inferior Temporal Gyrus | 187 | 5.064 | 48 | -60 | -6 |
|---------------------------|-----|-------|----|-----|----|

*Human<sub>Face>Scramble</sub> & Primate<sub>Face>Scramble</sub> & Dog<sub>Face>Scramble</sub>*

|                                  |      |        |     |     |     |
|----------------------------------|------|--------|-----|-----|-----|
| R Fusiform Gyrus                 | 2019 | 11.790 | 38  | -48 | -16 |
| L Inferior Occipital Gyrus       | 1989 | 8.440  | -36 | -82 | -4  |
| L Ventromedial PFC               | 366  | 6.928  | -4  | 44  | -18 |
| R Amygdala/ParaHippocampal Gyrus | 188  | 6.357  | 18  | -8  | -14 |
| L Dorsomedial PFC                | 162  | 5.994  | -8  | 60  | 26  |
| L Amygdala/ParaHippocampal Gyrus | 140  | 5.718  | -22 | -12 | -12 |
| L Precuneus                      | 88   | 5.159  | -2  | -52 | 22  |

*Human<sub>Face</sub> > Primate<sub>Face</sub> & Human<sub>Face</sub> > Dog<sub>Face</sub>*

*No suprathreshold clusters*

*Primate<sub>Face</sub> > Human<sub>Face</sub> & Dog<sub>Face</sub> > Human<sub>Face</sub>*

|                  |     |       |     |     |    |
|------------------|-----|-------|-----|-----|----|
| L Fusiform Gyrus | 134 | 6.382 | -30 | -64 | -4 |
|------------------|-----|-------|-----|-----|----|

---

**Figure S1**

The set of human facial expressions used in both the Explicit and Implicit tasks.

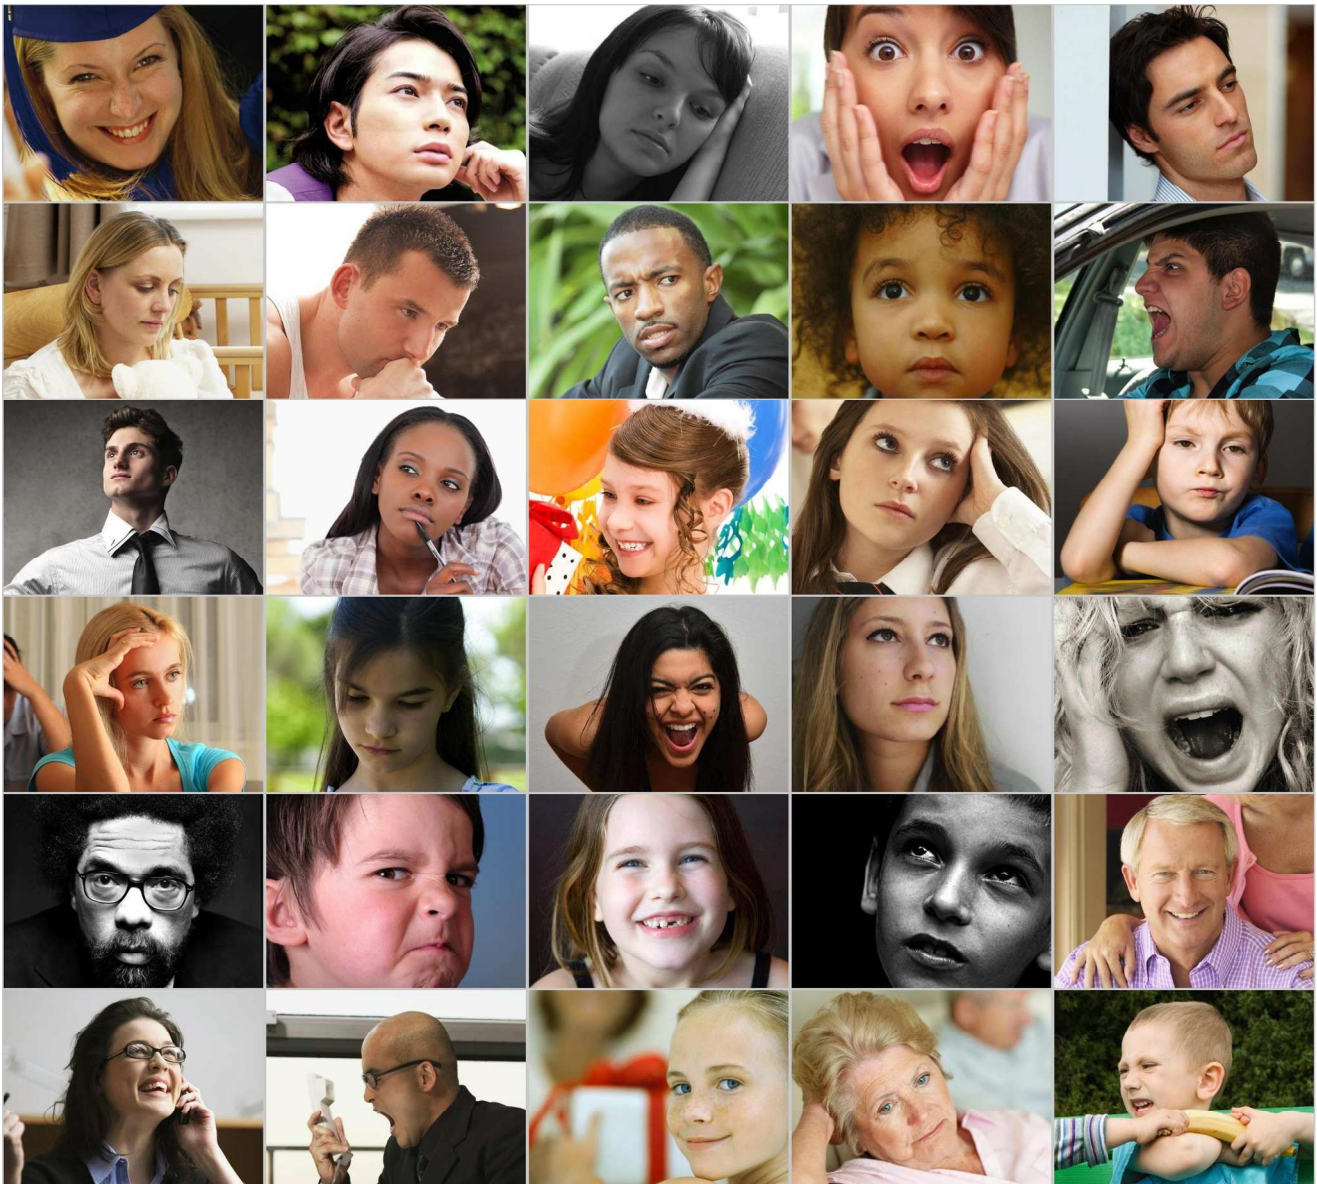

**Figure S2**

The set of non-human primate facial expressions used in both the Explicit and Implicit tasks.

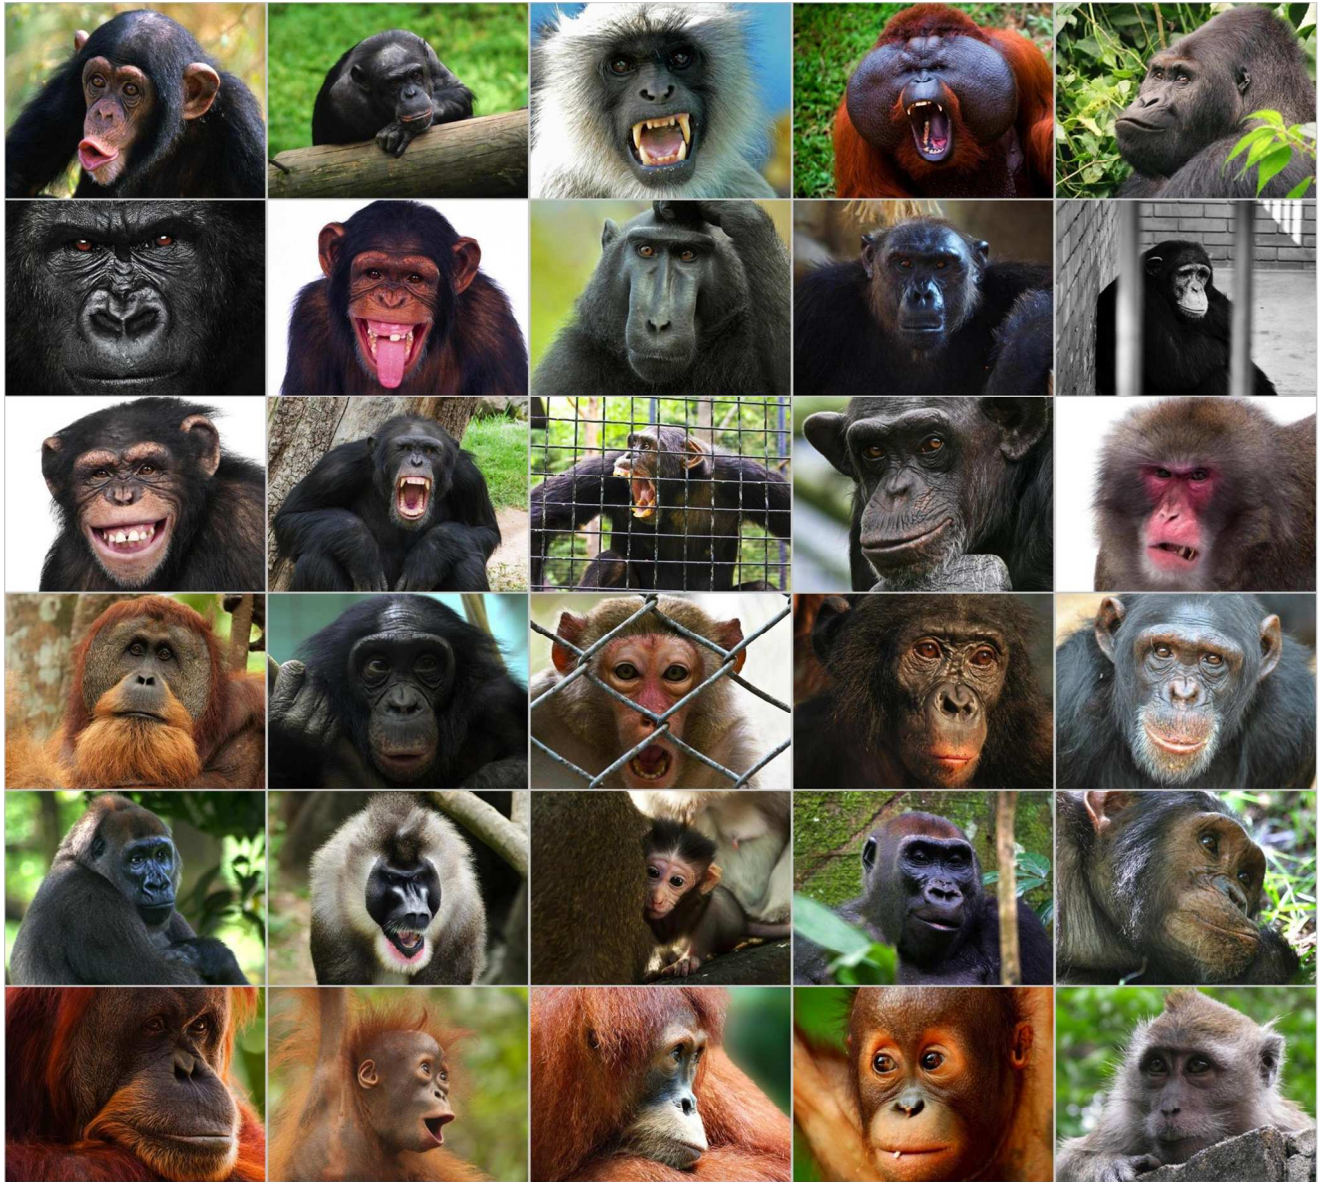

Supplement: nsw161_supp.pdf [file nsw161_supp.pdf]
